# Supplementary material for: Reassessment of American Joint Committee on Cancer Staging for Stage III Renal Cell Carcinoma With Nodal Involvement: Propensity Score Matched Analyses of a Large Population-Based Study
Source: PubMed Central journal article supplement (PMC7096477; doi:10.3389/fonc.2020.00365), 2020-03-19
Supplement: Data_Sheet_1.pdf [file Data_Sheet_1.pdf]

Table S1. Baseline characteristics of pT<sub>4</sub>N<sub>any</sub>M<sub>0</sub> and pT<sub>any</sub>N<sub>any</sub>M<sub>1</sub> groups before and after matching

| Characteristic           | Before Matching                                               |                                                                  |            | After Matching*                                               |                                                                 |            |
|--------------------------|---------------------------------------------------------------|------------------------------------------------------------------|------------|---------------------------------------------------------------|-----------------------------------------------------------------|------------|
|                          | Stage IV-M0                                                   | Stage IV-M1                                                      | <i>P</i> † | Stage IV-M0                                                   | Stage IV-M1                                                     | <i>P</i> † |
|                          | pT <sub>4</sub> N <sub>any</sub> M <sub>0</sub><br>(N=105, %) | pT <sub>any</sub> N <sub>any</sub> M <sub>1</sub><br>(N=1007, %) |            | pT <sub>4</sub> N <sub>any</sub> M <sub>0</sub><br>(N=105, %) | pT <sub>any</sub> N <sub>any</sub> M <sub>1</sub><br>(N=105, %) |            |
| Age, mean (95% CI), y    | 59.7 (57.7-61.6)                                              | 58.2 (57.6-58.9)                                                 | 0.18       | 59.7 (57.8-61.7)                                              | 58.9 (56.7-61.0)                                                | 0.58       |
| Sex                      |                                                               |                                                                  | 0.091      |                                                               |                                                                 | 0.98       |
| Male                     | 65 (61.9)                                                     | 704 (69.9)                                                       |            | 65 (61.9)                                                     | 65 (61.9)                                                       |            |
| Female                   | 40 (38.1)                                                     | 303 (30.1)                                                       |            | 40 (38.1)                                                     | 40 (38.1)                                                       |            |
| Race                     |                                                               |                                                                  | 0.41       |                                                               |                                                                 | 0.094      |
| White                    | 88 (83.8)                                                     | 873 (86.7)                                                       |            | 88 (83.8)                                                     | 96 (91.4)                                                       |            |
| Nonwhite                 | 17 (16.2)                                                     | 134 (13.3)                                                       |            | 17 (16.2)                                                     | 9 (8.6)                                                         |            |
| Grade                    |                                                               |                                                                  | 0.56       |                                                               |                                                                 | 0.99       |
| Well/Moderately          | 13 (12.4)                                                     | 164 (16.3)                                                       |            | 13 (12.4)                                                     | 13 (12.4)                                                       |            |
| Poor                     | 53 (50.5)                                                     | 441 (43.8)                                                       |            | 53 (50.5)                                                     | 53 (50.5)                                                       |            |
| Undifferentiated         | 32 (30.5)                                                     | 327 (32.5)                                                       |            | 32 (30.5)                                                     | 32 (30.5)                                                       |            |
| Unknown                  | 7 (6.7)                                                       | 75 (7.4)                                                         |            | 7 (6.7)                                                       | 7 (6.7)                                                         |            |
| Tumor site               |                                                               |                                                                  | 0.79       |                                                               |                                                                 | 0.49       |
| Left                     | 60 (57.1)                                                     | 561 (55.7)                                                       |            | 60 (57.1)                                                     | 55 (52.4)                                                       |            |
| Right                    | 45 (42.9)                                                     | 446 (44.3)                                                       |            | 45 (42.9)                                                     | 50 (47.6)                                                       |            |
| Histology                |                                                               |                                                                  | 0.011      |                                                               |                                                                 | 0.99       |
| Clear cell               | 84 (80.0)                                                     | 899 (89.3)                                                       |            | 84 (80.0)                                                     | 84 (80.0)                                                       |            |
| Chromophobe              | 6 (5.7)                                                       | 22 (2.2)                                                         |            | 6 (5.7)                                                       | 6 (5.7)                                                         |            |
| Papillary                | 15 (14.3)                                                     | 86 (8.5)                                                         |            | 15 (14.3)                                                     | 15 (14.3)                                                       |            |
| T stage                  |                                                               |                                                                  | NA         |                                                               |                                                                 | NA         |
| T1                       | 0 (0.0)                                                       | 66 (6.6)                                                         |            | 0 (0.0)                                                       | 8 (7.7)                                                         |            |
| T2                       | 0 (0.0)                                                       | 160 (15.9)                                                       |            | 0 (0.0)                                                       | 10 (9.6)                                                        |            |
| T3a                      | 0 (0.0)                                                       | 382 (37.9)                                                       |            | 0 (0.0)                                                       | 43 (41.0)                                                       |            |
| T3b                      | 0 (0.0)                                                       | 247 (24.5)                                                       |            | 0 (0.0)                                                       | 26 (24.8)                                                       |            |
| T3c                      | 0 (0.0)                                                       | 21 (2.1)                                                         |            | 0 (0.0)                                                       | 1 (1.0)                                                         |            |
| T3NOS                    | 0 (0.0)                                                       | 18 (1.8)                                                         |            | 0 (0.0)                                                       | 1 (1.0)                                                         |            |
| T4                       | 105 (100.0)                                                   | 113 (11.2)                                                       |            | 105 (100.0)                                                   | 16 (15.2)                                                       |            |
| N stage                  |                                                               |                                                                  | 0.001      |                                                               |                                                                 | 0.011      |
| N0                       | 88 (83.8)                                                     | 585 (58.1)                                                       |            | 88 (83.8)                                                     | 47 (44.8)                                                       |            |
| N1                       | 17 (16.2)                                                     | 422 (41.7)                                                       |            | 17 (16.2)                                                     | 58 (55.2)                                                       |            |
| Invasion beyond capsule‡ |                                                               |                                                                  | NA         |                                                               |                                                                 | NA         |
| No                       | 12 (17.1)                                                     | 200 (35.3)                                                       |            | 12 (17.1)                                                     | 17 (27.9)                                                       |            |
| Yes                      | 56 (80.0)                                                     | 321 (56.6)                                                       |            | 56 (80.0)                                                     | 38 (62.3)                                                       |            |
| Unknown                  | 2 (2.9)                                                       | 46 (8.1)                                                         |            | 2 (2.9)                                                       | 6 (9.8)                                                         |            |
| Fuhrman nuclear grade‡   |                                                               |                                                                  | NA         |                                                               |                                                                 | NA         |
| Grade 1/2                | 10 (14.3)                                                     | 87 (16.3)                                                        |            | 10 (14.3)                                                     | 9 (14.8)                                                        |            |
| Grade 3                  | 33 (47.1)                                                     | 231 (40.7)                                                       |            | 33 (47.1)                                                     | 20 (32.8)                                                       |            |
| Grade 4                  | 25 (35.7)                                                     | 214 (37.7)                                                       |            | 25 (35.7)                                                     | 23 (37.7)                                                       |            |
| Unknown                  | 2 (2.9)                                                       | 35 (6.2)                                                         |            | 2 (2.9)                                                       | 9 (14.8)                                                        |            |

Table S1. Continued

|                                   |           |            |      |           |           |      |
|-----------------------------------|-----------|------------|------|-----------|-----------|------|
| Sarcomatoid features <sup>‡</sup> |           |            | NA   |           |           | NA   |
| Absence                           | 55 (78.6) | 459 (81.0) |      | 55 (78.6) | 48 (78.7) |      |
| Presence                          | 14 (20.0) | 83 (14.6)  |      | 14 (20.0) | 8 (13.1)  |      |
| Unknown                           | 1 (1.4)   | 25 (4.4)   |      | 1 (1.4)   | 5 (8.2)   |      |
| LNs examined, mean (95%CI)        | 8 (6-10)  | 8 (7-9)    | 0.99 | 8 (6-10)  | 8 (6-11)  | 0.99 |
| LNs positive, mean (95%CI)        | 1 (0-2)   | 2 (1-3)    | 0.18 | 1 (0-2)   | 2 (1-2)   | 0.1  |

Abbreviation: LN: lymph node; CI: Confidence interval; NA: Not Applicable

\*Adjusted for group, age, grade, and histology.

<sup>†</sup>Derived from  $\chi^2$ -test for categorical variables, general linear models for continuous variables.

<sup>‡</sup> Invasion beyond capsule, fuhrman nuclear grade, and sarcomatoid features were only applicable for 2010+ cases, and not enter into the  $\chi^2$ -test, thus the *P* value was not applicable.

Table S2. Univariate and multivariate analyses of overall survival and cause-specific survival to pT<sub>3</sub>N<sub>0</sub>M<sub>0</sub> and pT<sub>1-3</sub>N<sub>1</sub>M<sub>0</sub> groups after matching

| Characteristic           | Overall Survival |           |       |               |           |        | Cancer-specific Survival |           |        |               |           |        |
|--------------------------|------------------|-----------|-------|---------------|-----------|--------|--------------------------|-----------|--------|---------------|-----------|--------|
|                          | Univariate       |           |       | Multivariate† |           |        | Univariate               |           |        | Multivariate† |           |        |
|                          | HR               | 95% CI    | P     | HR            | 95% CI    | P      | HR                       | 95% CI    | P      | HR            | 95% CI    | P      |
| Age                      | 1.02             | 1.01-1.03 | 0.001 | 1.02          | 1.01-1.03 | 0.001  | 1.01                     | 1.00-1.02 | 0.046  | 1.01          | 1.00-1.02 | 0.040  |
| Sex                      |                  |           |       |               |           |        |                          |           |        |               |           |        |
| Male (ref.)              | 1.0              | 1.0       |       | /             | /         | /      | 1.0                      | 1.0       |        | /             | /         | /      |
| Female                   | 0.95             | 0.74-1.2  | 0.69  | /             | /         | /      | 1.0                      | 0.78-1.3  | 0.89   | /             | /         | /      |
| Race                     |                  |           |       |               |           |        |                          |           |        |               |           |        |
| White (ref.)             | 1.0              | 1.0       |       | /             | /         | /      | 1.0                      | 1.0       |        | /             | /         | /      |
| Nonwhite                 | 1.1              | 0.83-1.5  | 0.48  | /             | /         | /      | 1.1                      | 0.80-1.5  | 0.56   | /             | /         | /      |
| Grade                    |                  |           |       |               |           |        |                          |           |        |               |           |        |
| Well/Moderately (ref.)   | 1.0              | 1.0       |       | 1.0           | 1.0       |        | 1.0                      | 1.0       |        | 1.0           | 1.0       |        |
| Poor                     | 1.3              | 0.92-1.8  | 0.14  | 1.3           | 0.96-1.8  | 0.083  | 1.3                      | 0.94-1.9  | 0.10   | 1.4           | 0.98-2.0  | 0.069  |
| Undifferentiated         | 1.9              | 1.4-2.7   | 0.001 | 2.0           | 1.4-2.8   | <0.001 | 2.0                      | 1.4-2.9   | <0.001 | 2.1           | 1.5-3.0   | <0.001 |
| Unknown                  | 1.1              | 0.68-1.9  | 0.62  | 1.2           | 0.73-2.1  | 0.43   | 1.3                      | 0.78-2.3  | 0.30   | 1.4           | 0.81-2.4  | 0.24   |
| Tumor site               |                  |           |       |               |           |        |                          |           |        |               |           |        |
| Left (ref.)              | 1.0              | 1.0       |       | /             | /         | /      | 1.0                      | 1.0       |        | 1.0           | 1.0       |        |
| Right                    | 1.2              | 0.98-1.5  | 0.078 | /             | /         | /      | 1.3                      | 1.0-1.6   | 0.051  | 1.3           | 1.0-1.6   | 0.049  |
| Histology                |                  |           |       |               |           |        |                          |           |        |               |           |        |
| Clear cell (ref.)        | 1.0              | 1.0       |       | 1.0           | 1.0       |        | 1.0                      | 1.0       |        | 1.0           | 1.0       |        |
| Chromophobe              | 0.30             | 0.13-0.68 | 0.004 | 0.30          | 0.13-0.69 | 0.004  | 0.28                     | 0.12-0.68 | 0.005  | 0.29          | 0.12-0.70 | 0.006  |
| Papillary                | 1.2              | 0.89-1.6  | 0.24  | 1.2           | 0.92-1.7  | 0.17   | 1.2                      | 0.88-1.6  | 0.24   | 1.3           | 0.92-1.7  | 0.16   |
| Invasion beyond capsule‡ |                  |           |       |               |           |        |                          |           |        |               |           |        |
| No (ref.)                | 1.0              | 1.0       |       | /             | /         | /      | 1.0                      | 1.0       |        | /             | /         | /      |
| Yes                      | 1.1              | 0.75-1.5  | 0.76  | /             | /         | /      | 0.80                     | 0.44-1.5  | 0.47   | /             | /         | /      |
| Unknown                  | 1.3              | 0.75-2.3  | 0.33  | /             | /         | /      | 0.79                     | 0.43-1.4  | 0.46   | /             | /         | /      |
| Fuhrman nuclear grade‡   |                  |           |       |               |           |        |                          |           |        |               |           |        |
| Grade 1/2 (ref.)         | 1.0              | 1.0       |       | 1.0           | 1.0       |        | 1.0                      | 1.0       |        | 1.0           | 1.0       |        |
| Grade 3                  | 1.6              | 0.92-2.8  | 0.096 | 1.4           | 0.80-2.5  | 0.23   | 1.8                      | 0.96-3.3  | 0.067  | 1.5           | 0.83-2.9  | 0.17   |

Table S2. Continued.

|                                                      |      |           |        |     |          |        |      |           |        |     |          |        |
|------------------------------------------------------|------|-----------|--------|-----|----------|--------|------|-----------|--------|-----|----------|--------|
| Grade 4                                              | 3.5  | 2.0-6.0   | <0.001 | 2.5 | 1.4-4.4  | 0.001  | 3.7  | 2.0-6.8   | <0.001 | 2.6 | 1.4-4.8  | 0.003  |
| Unknown                                              | 2.0  | 0.98-4.2  | 0.058  | 1.4 | 0.63-2.9 | 0.44   | 2.5  | 1.2-5.4   | 0.020  | 1.6 | 0.70-3.5 | 0.28   |
| Sarcomatoid features‡                                |      |           |        |     |          |        |      |           |        |     |          |        |
| Absence (ref.)                                       | 1.0  | 1.0       |        | 1.0 | 1.0      |        | 1.0  | 1.0       |        | 1.0 | 1.0      |        |
| Presence                                             | 2.6  | 1.7-3.9   | <0.001 | 1.7 | 1.1-2.7  | 0.016  | 2.7  | 1.8-4.2   | <0.001 | 1.8 | 1.2-2.9  | 0.009  |
| Unknown                                              | 2.1  | 0.93-4.8  | 0.075  | 1.9 | 0.75-4.6 | 0.18   | 2.4  | 1.1-5.6   | 0.035  | 2.0 | 0.77-5.1 | 0.16   |
| LN <sub>s</sub> examined                             | 1.00 | 0.99-1.01 | 0.74   | /   | /        | /      | 1.00 | 0.99-1.01 | 0.63   | /   | /        | /      |
| LN <sub>s</sub> positive                             | 1.01 | 1.00-1.01 | 0.18   | /   | /        | /      | 1.01 | 1.00-1.01 | 0.21   | /   | /        | /      |
| Group                                                |      |           |        |     |          |        |      |           |        |     |          |        |
| pT <sub>3</sub> N <sub>0</sub> M <sub>0</sub> (ref.) | 1.0  | 1.0       |        | 1.0 | 1.0      |        | 1.0  | 1.0       |        | 1.0 | 1.0      |        |
| pT <sub>1-3</sub> N <sub>1</sub> M <sub>0</sub>      | 2.3  | 1.8-2.9   | <0.001 | 2.5 | 1.9-3.1  | <0.001 | 2.4  | 1.8-3.1   | <0.001 | 2.5 | 2.0-3.3  | <0.001 |

Abbreviation: HR: hazards ratio; CI: confidence intervals; LN: lymph node; ref.: referent

\*Adjusted for group, age, grade, and histology

†Adjusted for age, group, grade, and histology for both overall survival and cause-specific survival.

‡ Invasion beyond capsule, fuhrman nuclear grade, and sarcomatoid features were only applicable for 2010+ cases, and adjusted for age, group, histology for 2010+ cases

Figure S1. Propensity score distribution\* for stage III-N0 and III-N1 groups (A), stage III-N1 and IV-M0 groups (B), stage IV-M0 and IV-M1 groups (C), and stage III-N1 and IV-M1 groups (D).

\*Dot-plot demonstrate the distribution of propensity scores for related groups in renal cell carcinoma patients. Stratified into matched and unmatched categories.

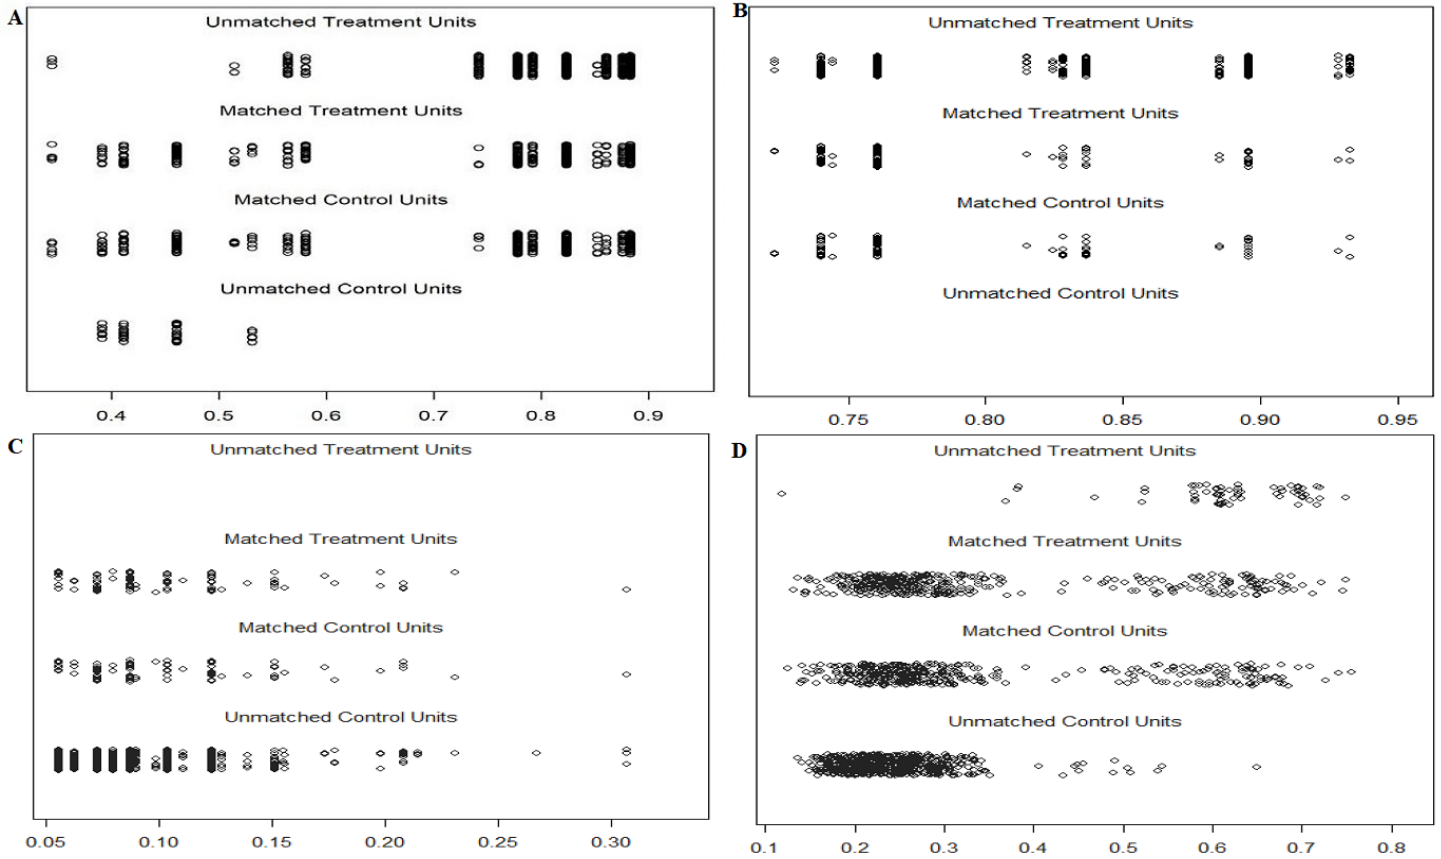

Figure S2. Kaplan-Meire estimation of overall survival curves (before matching: A; After matching: C) and cancer-specific survival curves (before matching: B; After matching: D) relative to each histology groups.

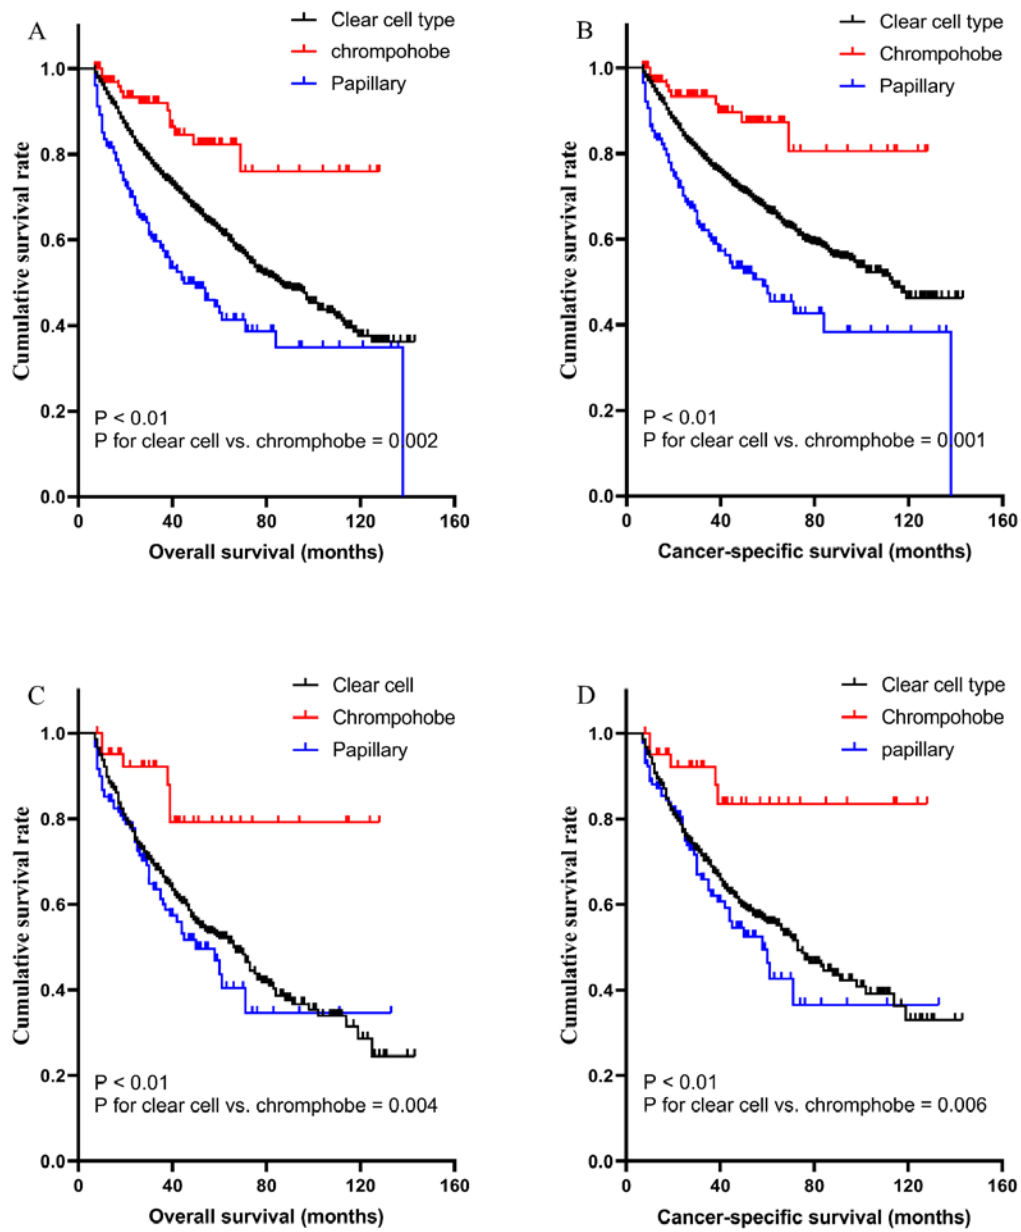

Figure S3. Kaplan-Meire estimation of overall survival curves (A) and cancer-specific survival curves (B) relative to stage III-N1 and stage IV-M0 groups after matching.

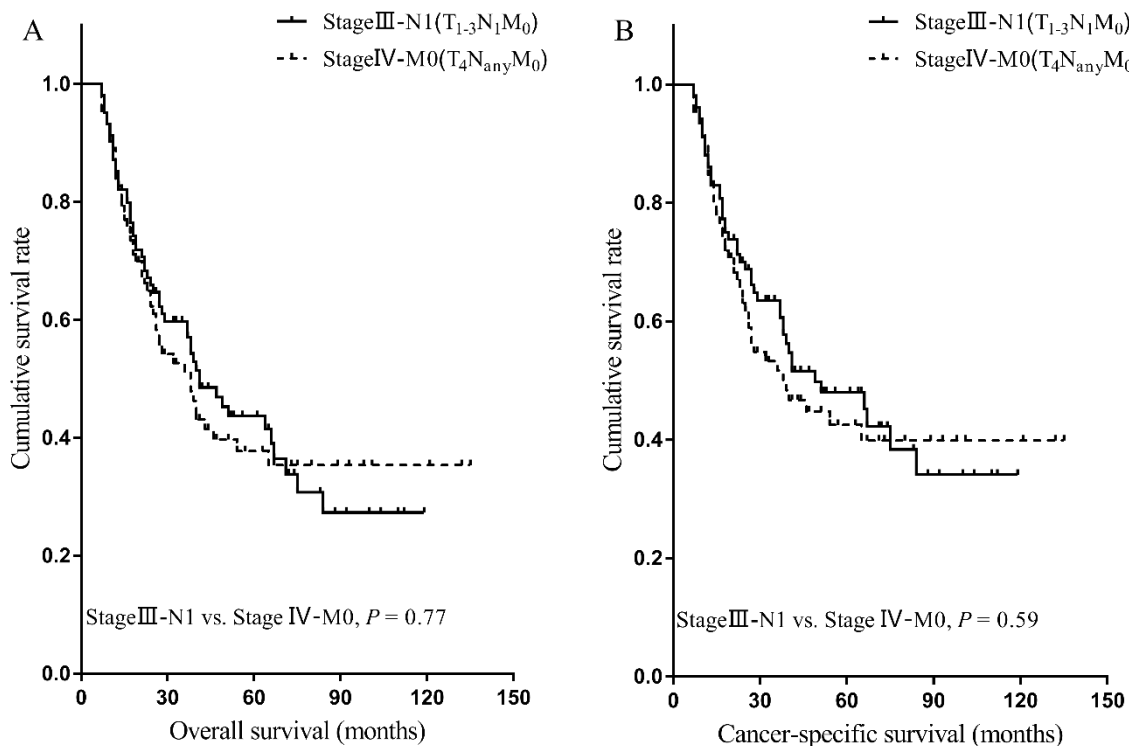

Number at risk

|              |     |    |    |   |   |
|--------------|-----|----|----|---|---|
| Stage III-N1 | 105 | 49 | 22 | 8 | 1 |
| Stage IV-M0  | 105 | 38 | 19 | 9 | 4 |

Number at risk

|              |     |    |    |   |   |
|--------------|-----|----|----|---|---|
| Stage III-N1 | 105 | 49 | 21 | 8 | 1 |
| Stage IV-M0  | 105 | 38 | 19 | 9 | 4 |

Figure S4. Kaplan-Meire estimation of overall survival curves (before matching: A; After matching: C) and cancer-specific survival curves (before matching: B; After matching: D) relative to each groups.

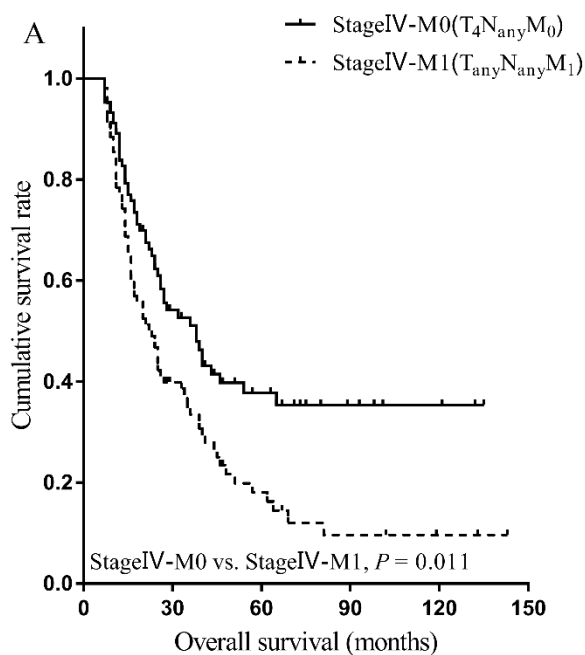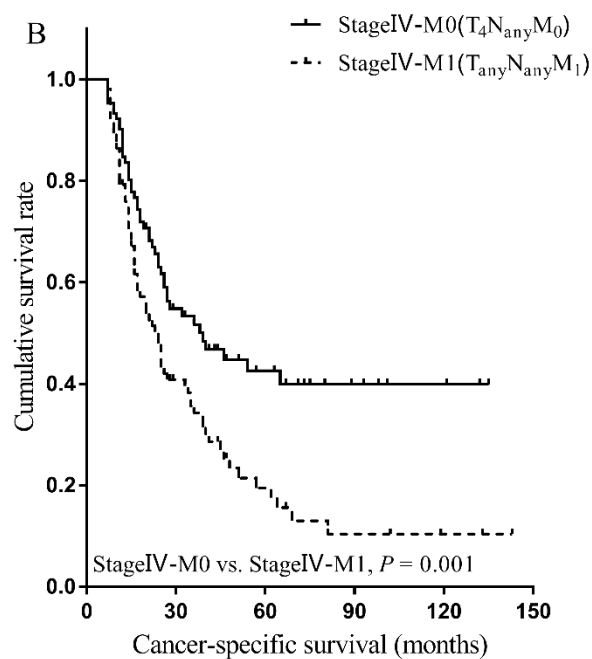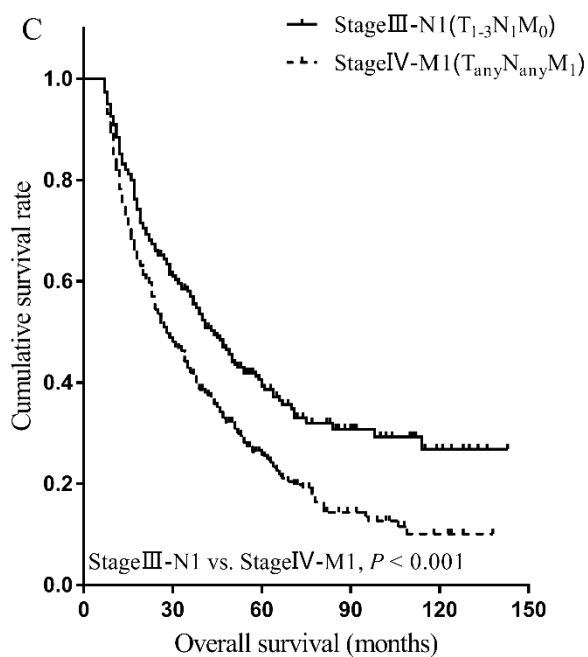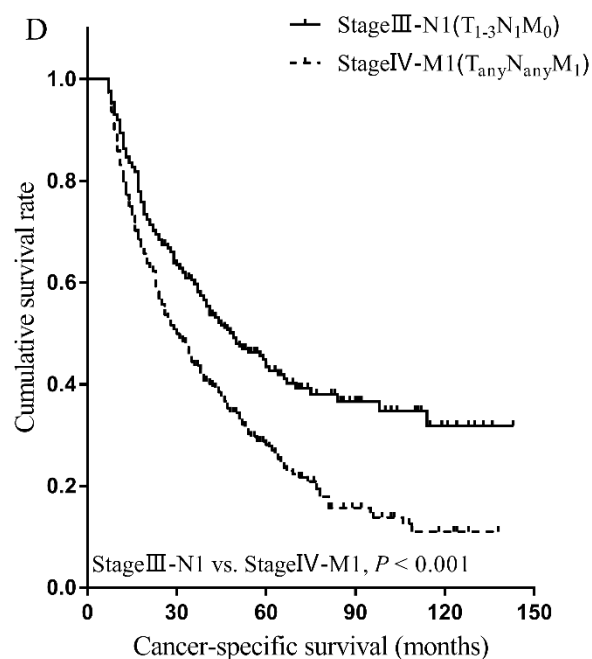



Figure S5. Kaplan-Meire estimation of overall survival curves (before matching\*: A; After matching\*: C) and cancer-specific survival curves (before matching\*: B; After matching\*: D) relative to each group for cases diagnosed after 2010.

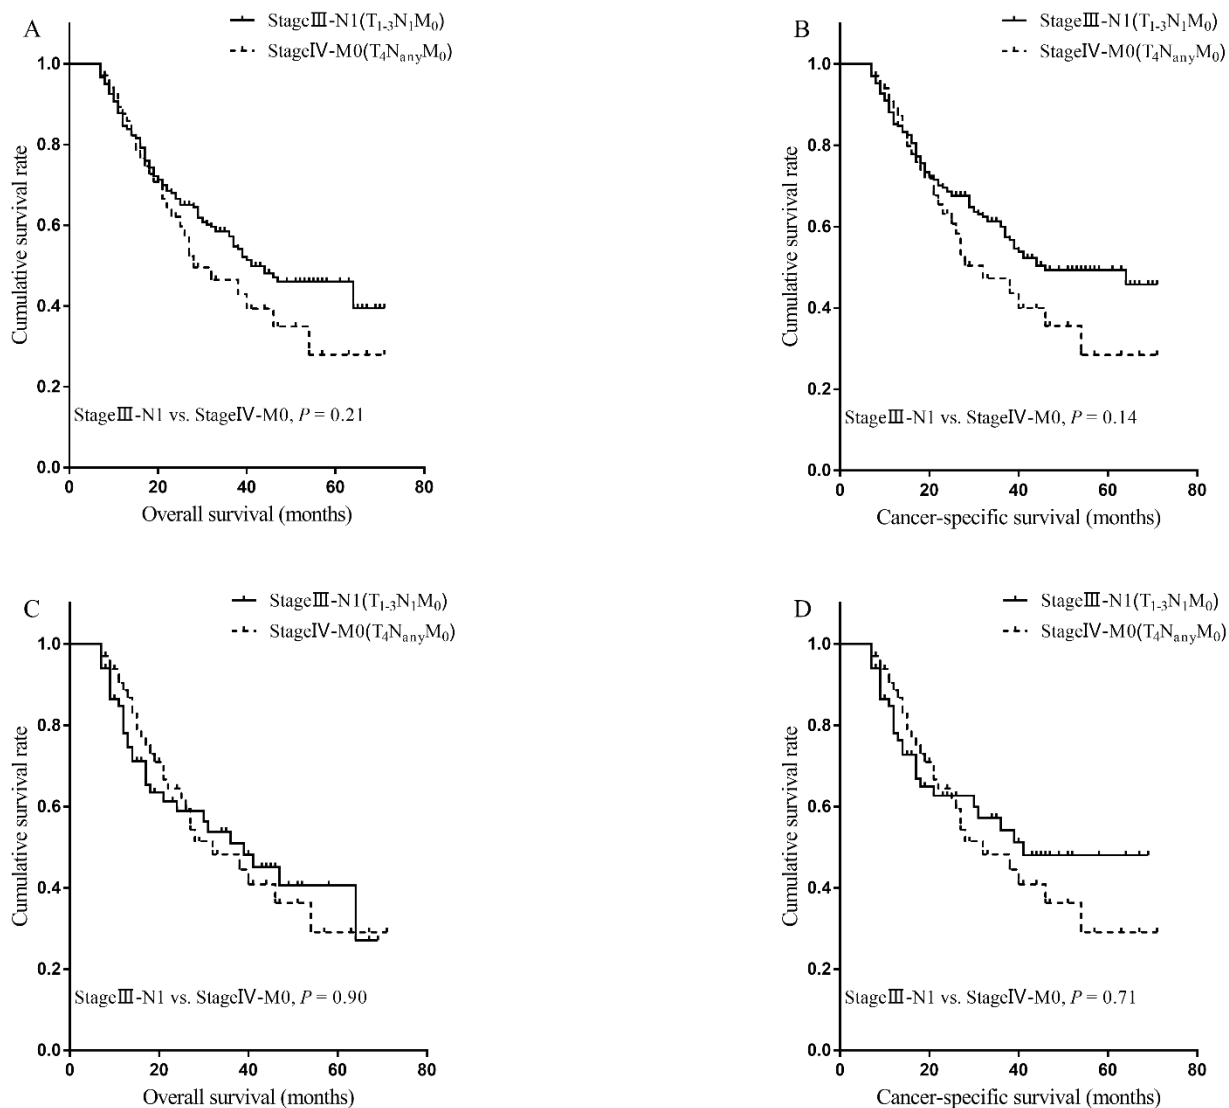

\*For cases diagnosed after 2010, age, group, grade, histology, and sarcomatoid features were matched for both overall survival and cause-specific survival

Figure S6. Prognostic nomogram, calibration curves of overall survival (OS) for modified stage of study patients. Notes: (A) The nomogram predicts 1-, 3-, and 5-year OS in patients with renal cell carcinoma. The calibration curves predicts OS at 1 year (B), 3 year (C), and 5 year (D) in the primary cohort and at 1 year (E), 3 year (F), and 5 year (G) in the validation cohort.

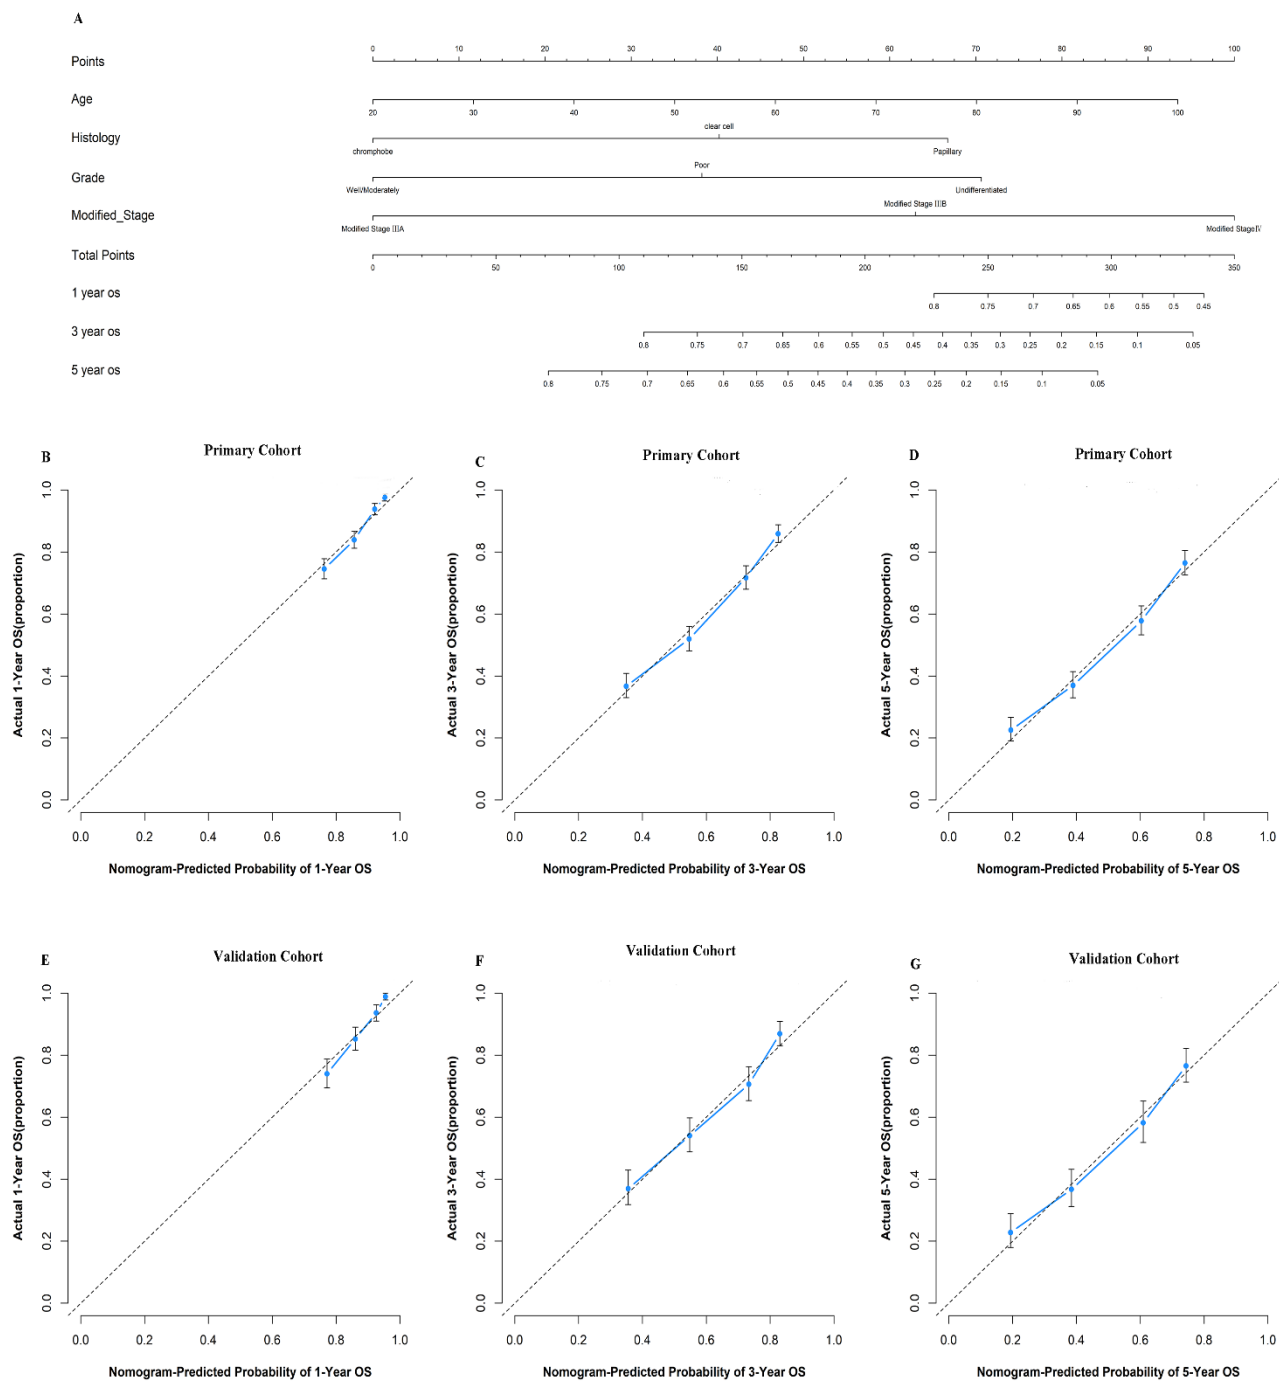

```

1 Code for generating the nomogram with R
2 library(rms)
3 library(Hmisc)
4 library(survival)
5 library(survcomp)
6
7 Generate Cox Proportional Hazards Model
8 Cox_model1 <- cph(Surv(Time,Status) ~ AJCC_Stage+..., x=TRUE, y=TRUE, surv=TRUE, time.inc = 12 or 36 or 60);
9 Cox_model2 <- cph(Surv(Time,Status) ~ Modified_Stage+..., x=TRUE, y=TRUE, surv=TRUE, time.inc = 12 or 36 or
10 60);
11
12 Generate nomogram
13 survival1 <- Survival(Cox_model 1 or 2)
14 survival11 <- function(x)survival1(12,x) #1 year
15 survival12 <- function(x)survival1(36,x) #3 year
16 survival13 <- function(x)survival1(60,x) #5 year
17 nom <- nomogram(f1, fun=list(survival11, survival12, survival13), fun.at=c(0.05, seq(0.1, 0.75, by=0.05), 0.80), lp=F,
18 funlabel=c('1 year survival', '3 year survival', '5 year survival'))
19 plot(nom, cex.axis = 0.8,cex.lab=0.8)
20
21 For inner validation group
22 data <- read.csv("file location") #change to your dataset
23 data_v <- sample(nrow(your file), sample number, replace=FALSE)
24 data_validation <- data [data _v,]
25 data _validation <- read.csv("file location")
26
27 compute C-index and compare C-index
28 validate(Cox_model 1 or 2, method="boot", B=1000, dxy=T)
29 x1 <- predict(Cox_model1)
30 x2 <- predict(Cox_model2)
31 c1 <- concordance.index(x1,surv.time=Time, surv.event=Status, method="noether")
32 c2 <- concordance.index(x2,surv.time=Time, surv.event=Status, method="noether")
33 print(c(c1[1],c1$lower,c1$upper))
34 print(c(c2[1],c2$lower,c2$upper))
35 cindex.comp(c1,c2)
36
37 For calibration curve
38 calm <- calibrate(Cox_model, cmethod="KM", method="boot", u=12 or 36 or 60, m=600, B=1000)
39 opar <- par(no.readonly=T)

```

```
40 par(mar=c(8,5,3,2),cex=1.0)
41 plot(calm, lwd=1, lty=1, bty="n", subtitles = " ", font.lab = "2", errbar.col=c(rgb(0,0,0,maxColorValue=255)),
42 xlim=c(0,1), ylim=c(0,1), xlab="Nomogram-Predicted Probability", ylab="Actual survival",
43 col=c(rgb(192,98,83,maxColorValue=255)))
44 lines(calm[,c("mean.predicted", "KM")],type="b",lwd=2,col=c(rgb(30,144,255,maxColorValue=255)),pch=16)
45 abline(0,1,lty=2,lwd=1,col=c(rgb(0,0,0,maxColorValue=255)))
46 par(opar)
```
